# Supplementary material for: High-performance SiO electrodes for lithium-ion batteries: merged effects of a new polyacrylate binder and an electrode-maturation process
Source: Royal Society of Chemistry journal article supplement (doi:10.1039/d2ma01093c), 2023-01-01
Supplement: d2ma01093c1.pdf [file d2ma01093c1.pdf]

## Supporting Information

# High-Performance SiO Electrode for Lithium-ion Batteries: Merged Effect of New Polyacrylate Binder and Electrode- Maturation Process

Shogo Yamazaki,<sup>†</sup> Ryoichi Tatara,<sup>†</sup> Hironori Mizuta,<sup>‡</sup> Kei Kawano,<sup>‡</sup> Satoshi Yasuno,<sup>¶</sup> and  
Shinichi Komaba<sup>†\*</sup>

<sup>†</sup> Department of Applied Chemistry, Tokyo University of Science, 1-3 Kagurazaka,  
Shinjuku, Tokyo 162-8601, Japan

<sup>‡</sup>FUJIFILM Wako Pure Chemical Co. Ltd., 1633 Oazamatoba, Kawagoe-shi, Saitama  
350-1101, Japan

<sup>¶</sup>*Japan Synchrotron Radiation Research Institute, 1-1-1 Kouto, Sayo-gun, Hyogo, 679-  
5198, Japan*

\*Correspondence to: komaba@rs.tus.ac.jp

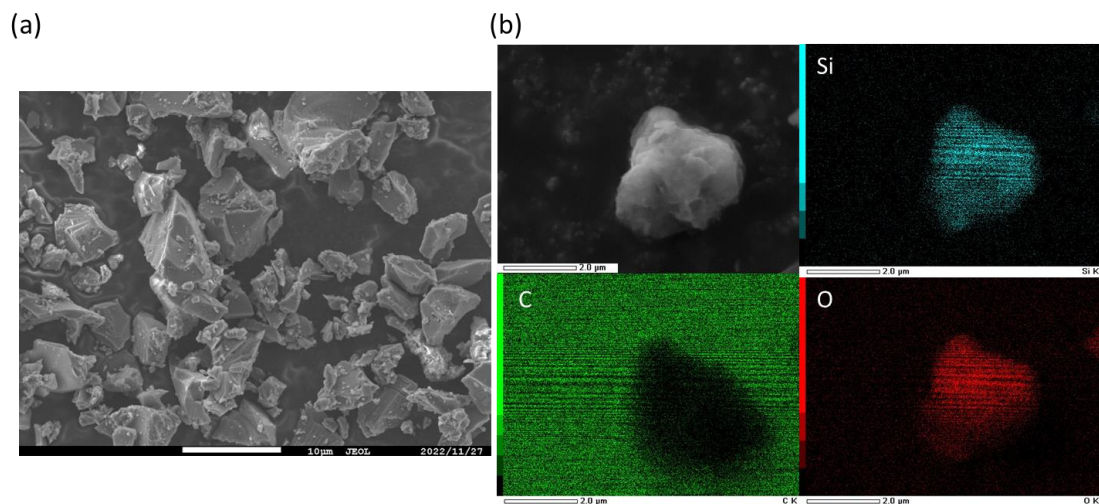

**Figure S1.** (a) SEM image of SiO@C particles and (b) corresponding EDS elemental mappings of Si, C, and O.

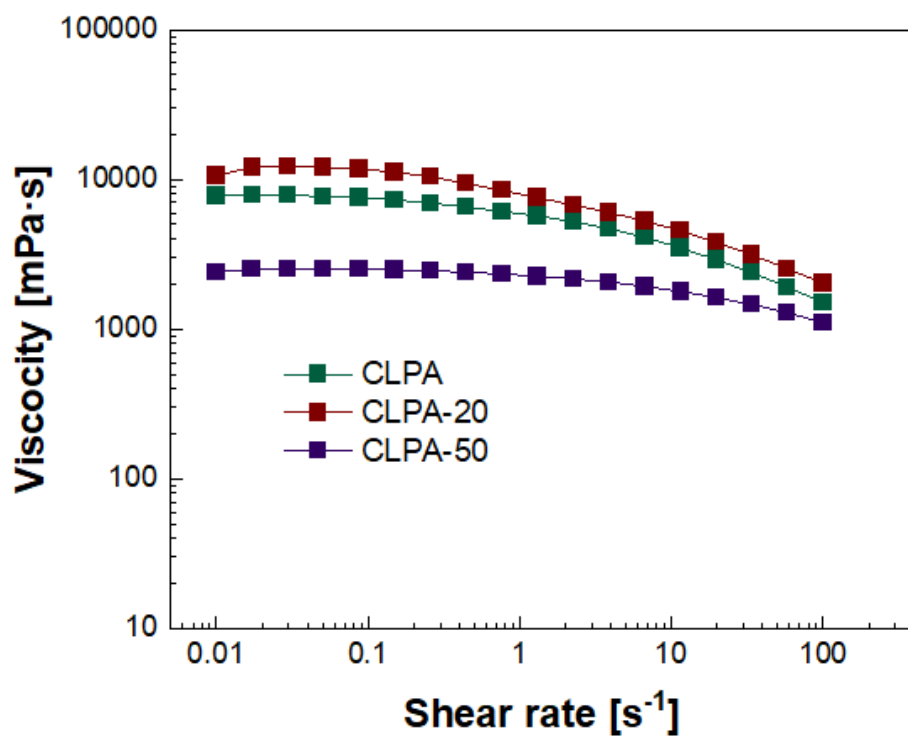

**Figure S2.** Viscosity flow curve of 10 wt % solution of CLPA, CLPA-20, and CLPA-50 binder.

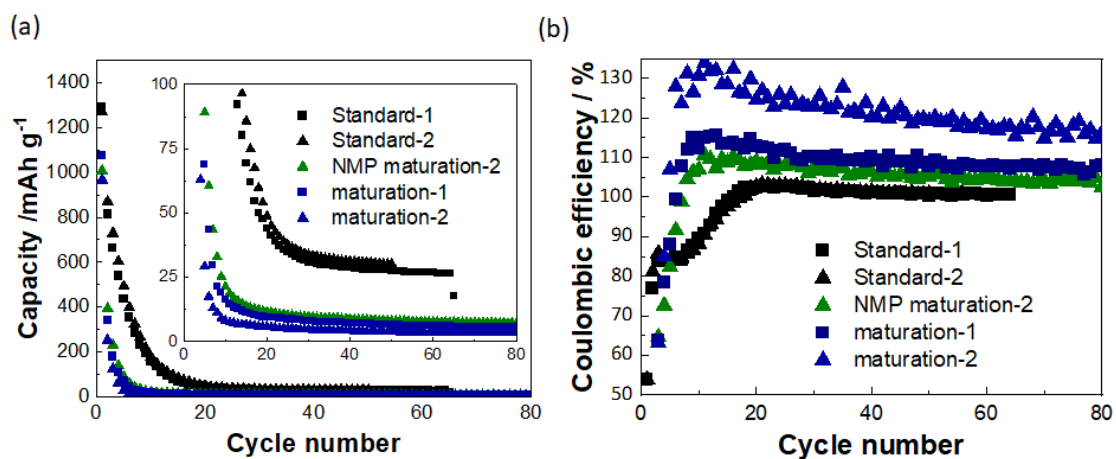

**Figure S3.** Cycling performance: (a) discharge capacity and (b) Coulombic efficiency of SiO@C/Li half-cells fabricated using SiO@C composite electrode with PVDF binder. The electrodes were matured for three days at 90% RH or saturated NMP-vapor.

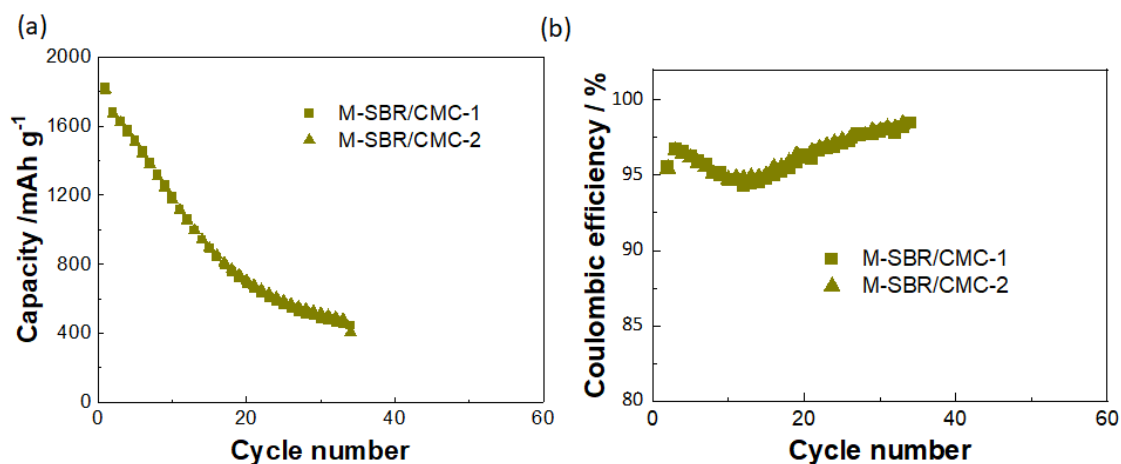

**Figure S4.** Cycling performance: (a) discharge capacity and (b) Coulombic efficiency of SiO@C/Li half-cells fabricated using SiO@C composite electrode with SBR/CMC binder. The electrodes were matured for three days at 90% RH.

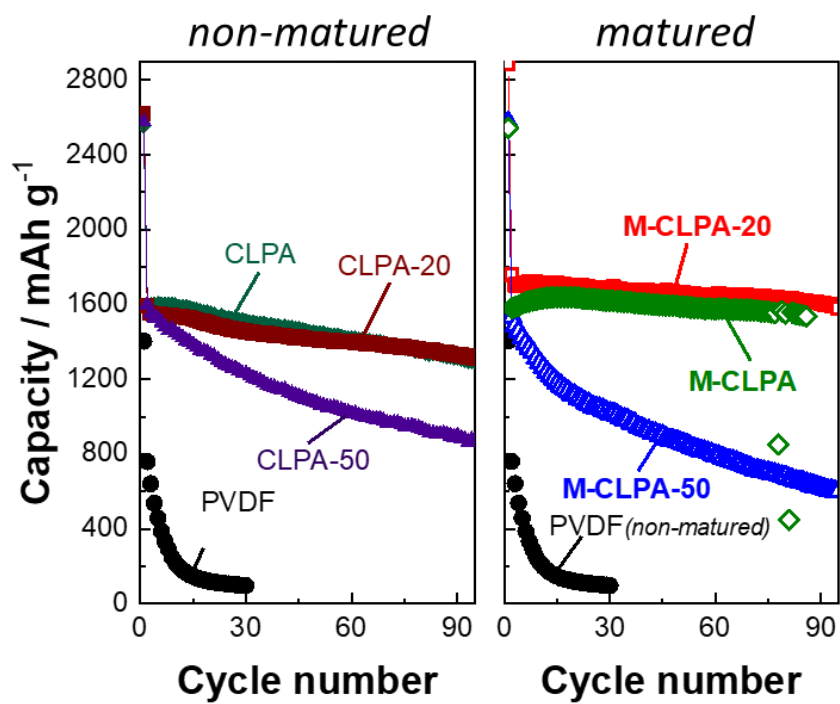

**Figure S5.** Cycling performance: variations in charge capacity of matured and non-matured SiO@C composite electrodes with PVDF and CLPA-based binders in Li half-cells.

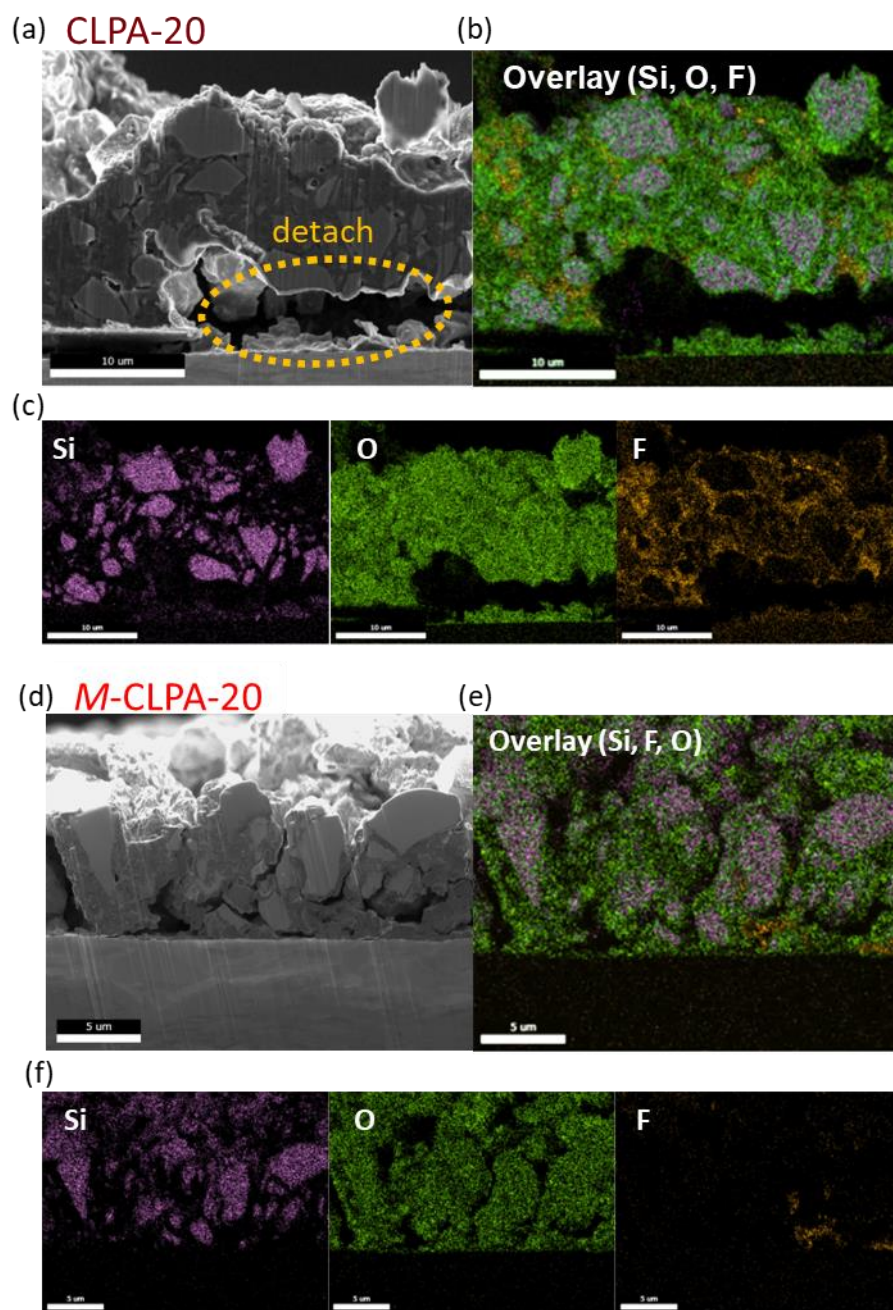

**Figure S6.** Cross-sectional SEM images of (a) non-matured SiO@C composite electrode with CLPA-20 and (b) corresponding EDS elemental mapping overlaid with of Si, Na, and O, and (c) elemental maps of Si, O, Na, and C, and (d) SiO@C composite electrodes with M-CLPA-20 after cycling and (e) corresponding EDS elemental mapping overlaid with of Si, Na, and O, and (f) elemental maps of Si, O, Na, and C.

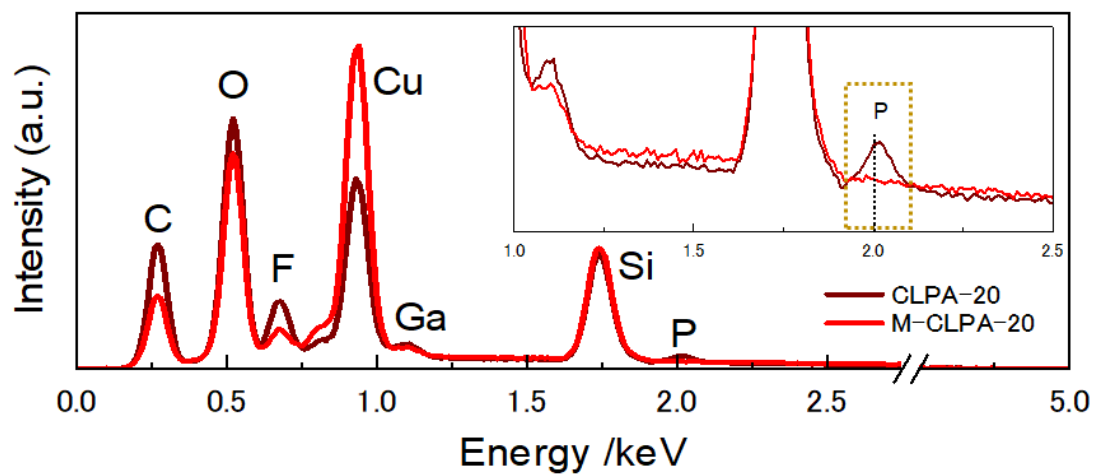

**Figure S7.** SEM-EDS profiles of non-matured and matured SiO@C composite electrodes with CLPA-20.

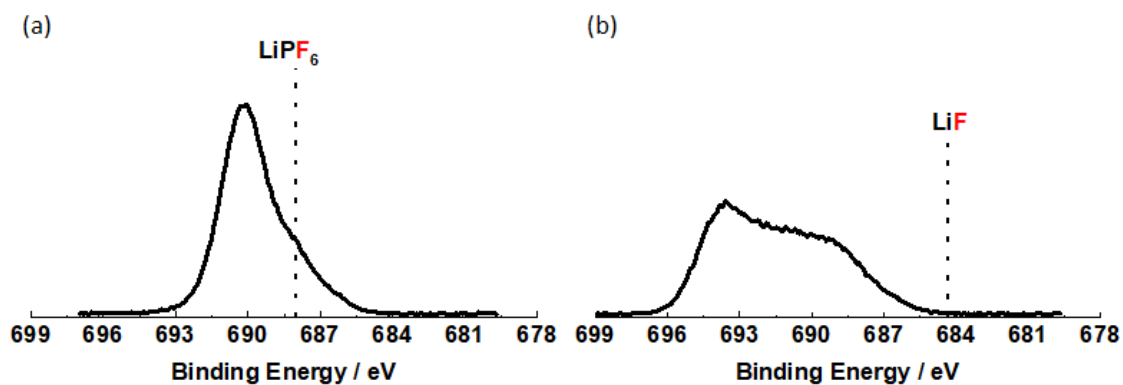

**Figure S8.** HAXPES spectra of F 1s: (a) LiF and (b) LiPF<sub>6</sub>. The samples composed of LiF or LiPF<sub>6</sub>: AB: PVA = 80: 10: 0.5 (weight ratio) were prepared in an Ar atmosphere.

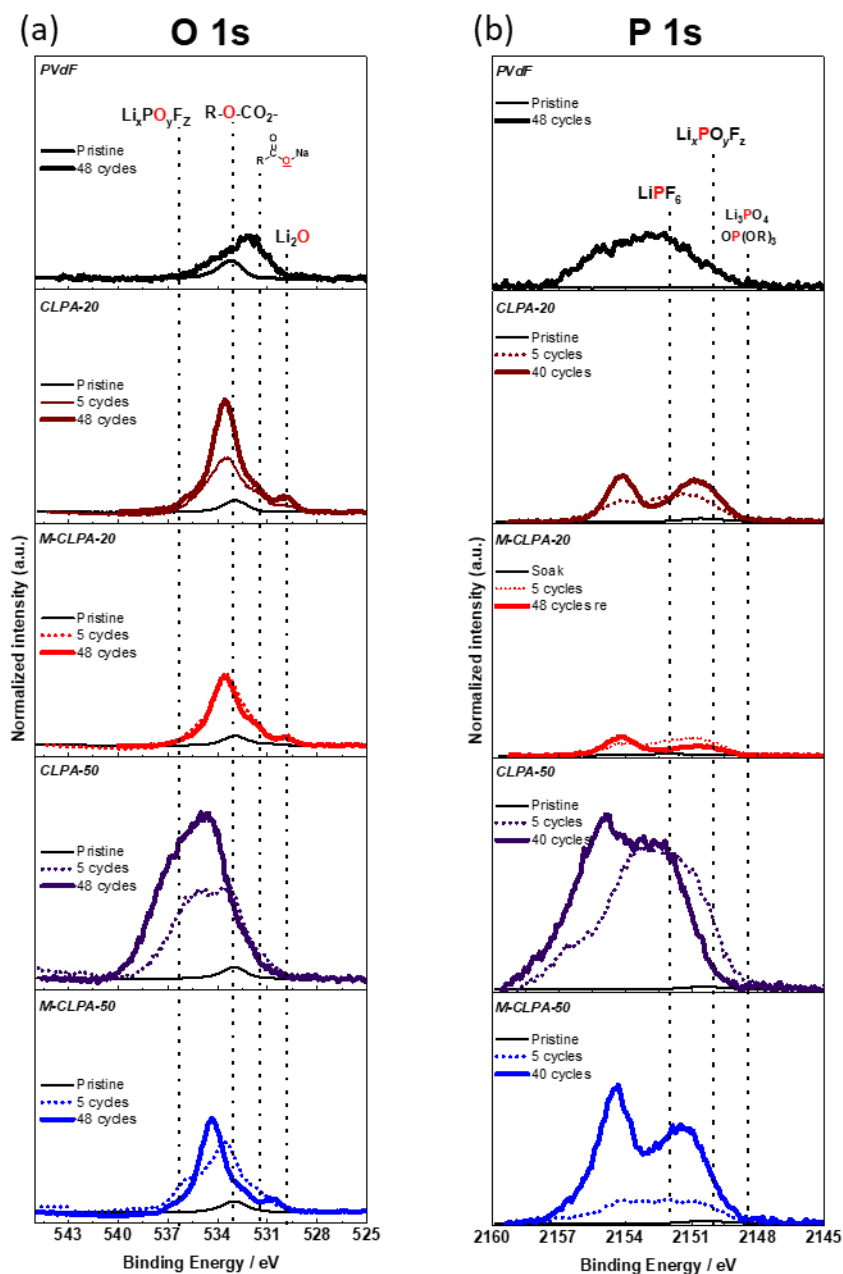

**Figure S9.** (a) O 1s and (b) P 1s HAXPES spectra of the non-matured and matured SiO@C composite electrodes with different binders before cycling, after 5 cycles, and after 48 cycles.

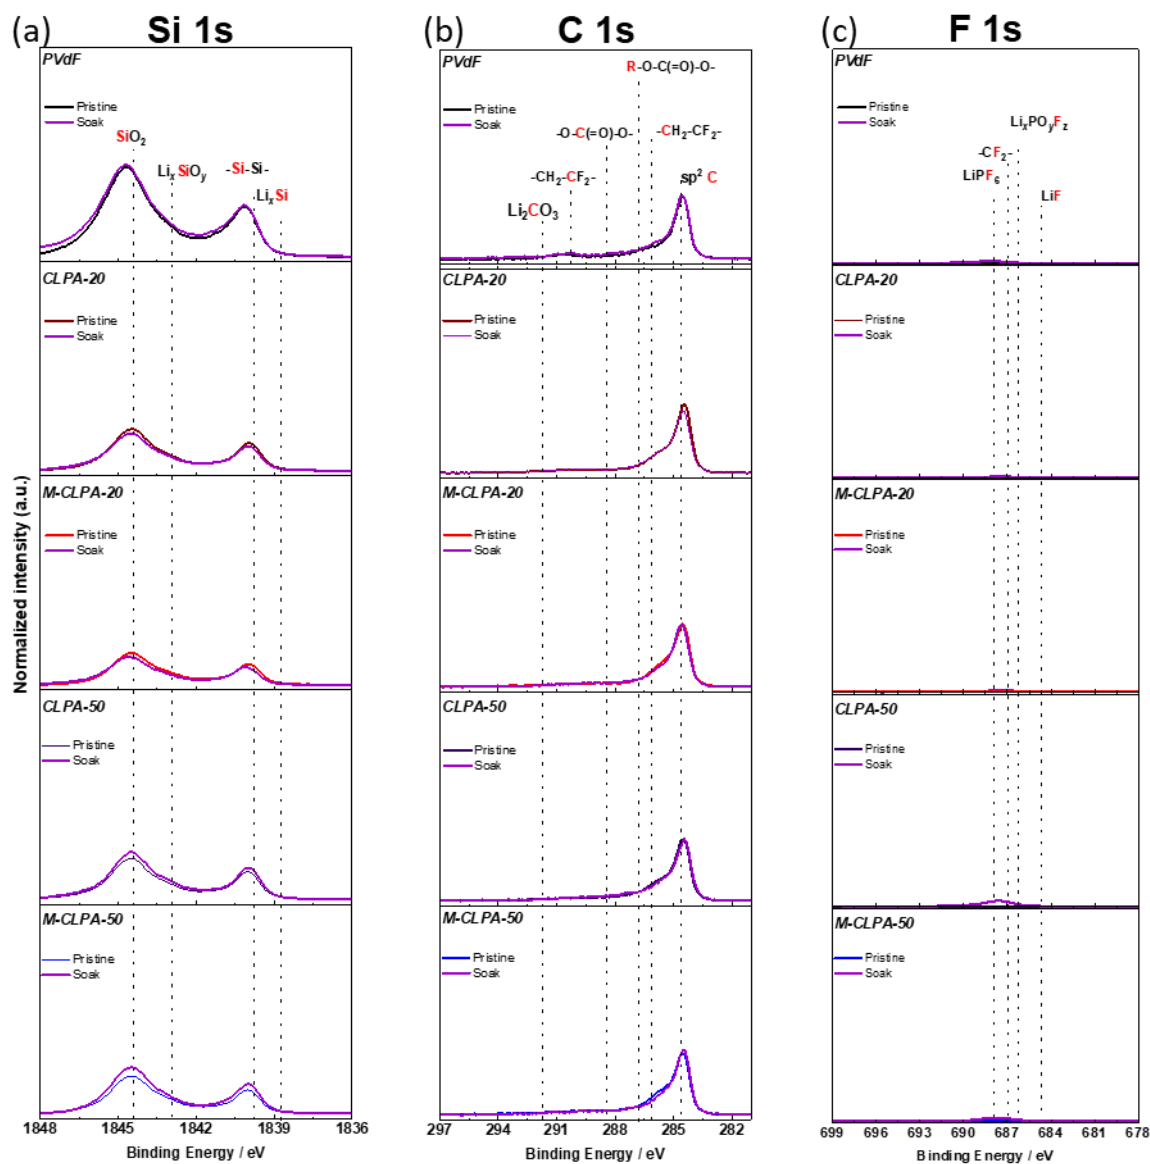

**Figure S10.** (a) Si 1s, (b) C 1s, and (c) F 1s HAXPES spectra of pristine and electrolyte (1 M  $\text{LiPF}_6$  in EC/DMC with 2 vol % FEC) soaked non-matured and matured  $\text{SiO}@C$  composite electrodes with different binders.



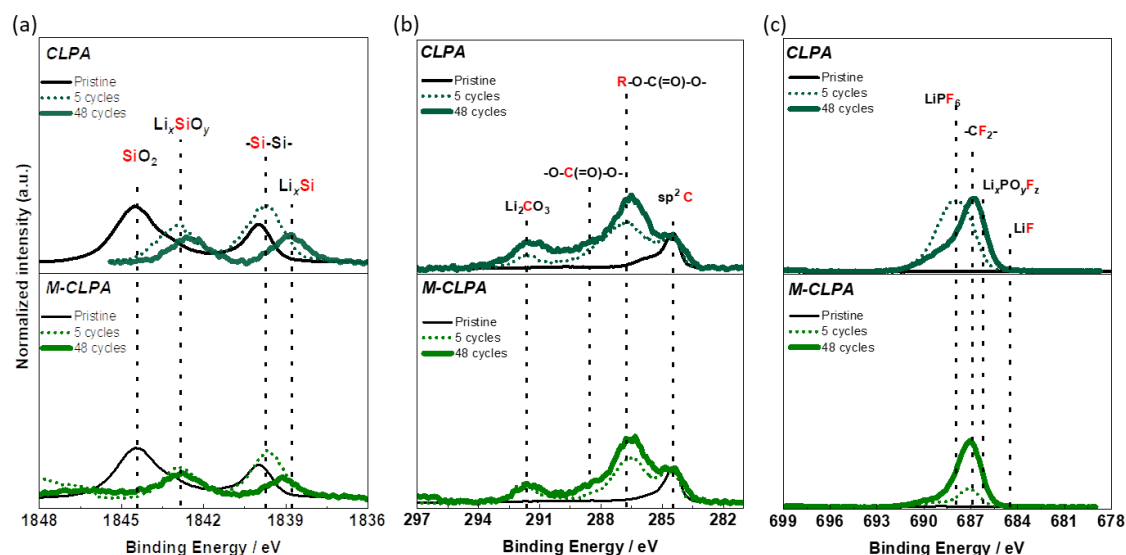

**Figure S11.** (a) Si 1s, (b) C 1s, and (c) F 1s HAXPES spectra of the non-matured and matured SiO@C composite electrodes with CLPA binder before cycling, after 5 cycles, and after 48 cycles.

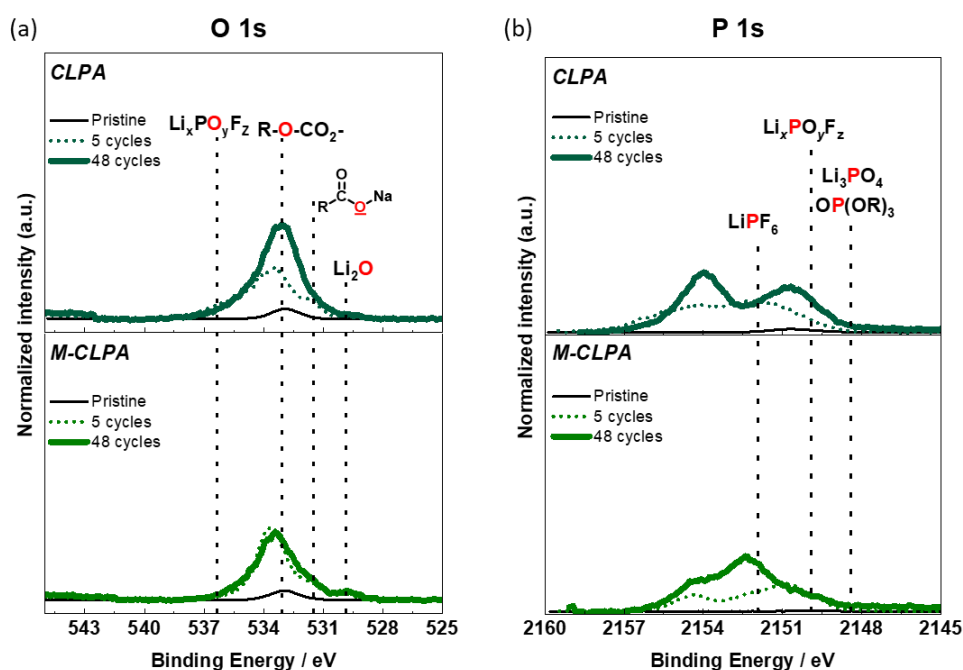

**Figure S12.** (a) O 1s and (b) P 1s HAXPES spectra of the non-matured and matured SiO@C composite electrodes with CLPA binder before cycling, after 5 cycles, and after 48 cycles.

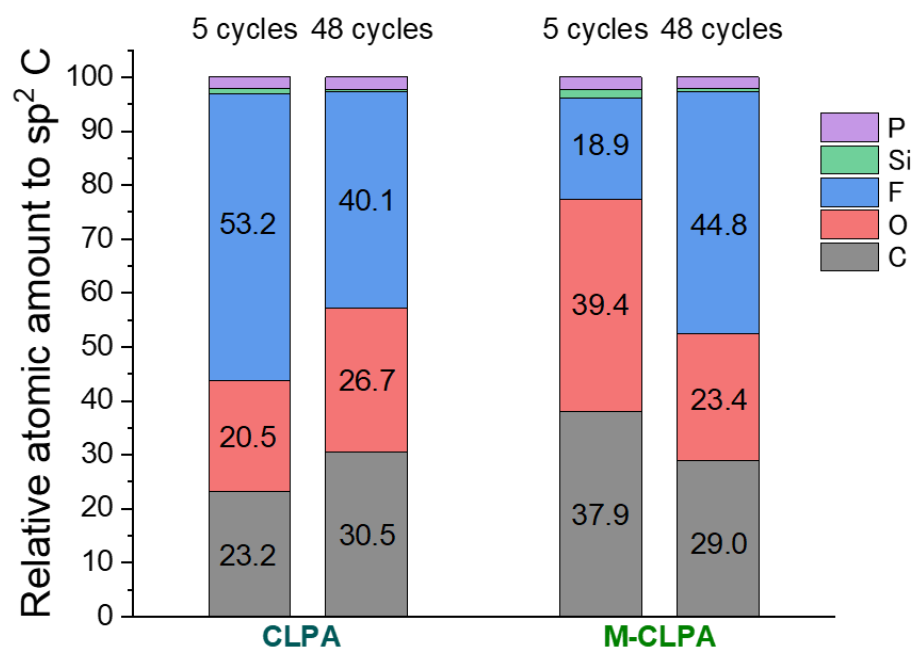

**Figure S13.** The atomic ratio of elements relative to  $sp^2$  carbon of non-matured and matured SiO@C composite electrode surfaces with CLPA.

**Table S1.** Comparison of electrochemical performance of SiO electrodes with each binder.

| Binder                                                                         | Capacity<br>(mAh g <sup>-1</sup> ) | Capacity<br>retention<br>(%) | Cycles | Current<br>(A g <sup>-1</sup> )                                     | Ref          |
|--------------------------------------------------------------------------------|------------------------------------|------------------------------|--------|---------------------------------------------------------------------|--------------|
| PAA                                                                            | 700                                | 84.7                         | 50     | 0.1                                                                 | [1]          |
| PAA + sorbitol                                                                 | 696                                | 71                           | 500    | 0.5                                                                 | [2]          |
| Sodium alginate                                                                | 923.5                              | 83.7                         | 50     | 1 <sup>st</sup> to 9 <sup>th</sup> : 0.1<br>10 <sup>th</sup> ~: 0.3 | [3]          |
| PAA + poly glutamic<br>acid                                                    | 1387.2                             | 87.3                         | 100    | 1 <sup>st</sup> : 0.08<br>2 <sup>nd</sup> ~: 0.16                   | [4]          |
| Polyacrylamide +<br>poly(tetrafluoroethylene)<br>+ styrene butadiene<br>rubber | 770                                | 60                           | 300    | 0.5                                                                 | [5]          |
| Poly (acrylamide +<br>acrylic acid)                                            | 734                                | 57.7                         | 300    | 1 <sup>st</sup> to 3 <sup>rd</sup> : 0.1<br>4 <sup>th</sup> ~:0.5   | [6]          |
| Poly (9,9-<br>dioctylfluorene-co-<br>fluorenone-co-methyl<br>benzoic ester)    | 1186                               | 106.9                        | 100    | 0.1                                                                 | [7]          |
| CLPA-20                                                                        | 1322                               | 87.3                         | 90     | 1 <sup>st</sup> : 0.025<br>2 <sup>nd</sup> ~:0.1                    | This<br>work |
| M-CLPA-20                                                                      | 1598                               | 96.5                         | 90     | 1 <sup>st</sup> : 0.025<br>2 <sup>nd</sup> ~:0.1                    | This<br>work |

## References

- 1 S. Komaba, K. Shimomura, N. Yabuuchi, T. Ozeki, H. Yui and K. Konno, *J. Phys. Chem. C*, 2011, **115**, 13487–13495.
- 2 D. He, P. Li, W. (Alex) Wang, Q. Wan, J. Zhang, K. Xi, X. Ma, Z. Liu, L. Zhang and X. Qu, *Small*, 2020, **16**, 1905736.
- 3 X. Feng, J. Yang, X. Yu, J. Wang and Y. Nuli, *J Solid State Electrochem*, 2013, **17**, 2461–2469.
- 4 M.-J. Guo, C.-C. Xiang, Y.-Y. Hu, L. Deng, S.-Y. Pan, C. Lv, S.-X. Chen, H.-T. Deng, C.-D. Sun, J.-T. Li, Y. Zhou and S.-G. Sun, *Electrochimica Acta*, 2022, **425**, 140704.
- 5 T. Kang, J. Chen, Y. Cui, Z. Wang, H. Xu, Z. Ma, X. Zuo, X. Xiao and J. Nan, *ACS Appl. Mater. Interfaces*, 2019, **11**, 26038–26046.
- 6 Z. Weng, S. Di, L. Chen, G. Wu, Y. Zhang, C. Jia, N. Zhang, X. Liu and G. Chen, *ACS Appl. Mater. Interfaces*, 2022, **14**, 42494–42503.
- 7 H. Zhao, N. Yuca, Z. Zheng, Y. Fu, V. S. Battaglia, G. Abdelbast, K. Zaghib and G. Liu, *ACS Appl. Mater. Interfaces*, 2015, **7**, 862–866.
